# Supplementary material
Source: MDPI journal article supplement (https://www.mdpi.com/2673-9992/14/1/102)
Supplement: s1 [file s1]

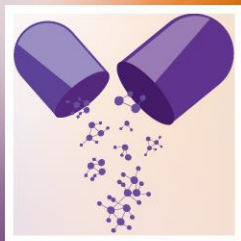

# The 8th International Electronic Conference on Medicinal Chemistry (ECMC 2022)

01-30 NOVEMBER 2022 | ONLINE

## Silver(I) complexes with clinically used azoles: synthesis, structural characterization and antimicrobial evaluation

Chaired by **DR. ALFREDO BERZAL-HERRANZ**;  
Co-Chaired by **PROF. DR. MARIA EMÍLIA SOUSA**

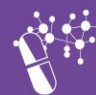

*pharmaceuticals*

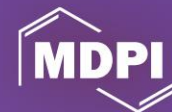

**Nevena Lj. Stevanović<sup>1\*</sup>, Jelena Lazić<sup>2</sup>, Jakob Kljun<sup>3</sup>, Mia Stanković<sup>1</sup>, Jasmina Nikodinovic-Runic<sup>2</sup>, Iztok Turel<sup>3</sup>, Miloš I. Djuran<sup>4</sup> and Biljana Đ. Glišić<sup>1</sup>**

<sup>1</sup>University of Kragujevac, Faculty of Science, Department of Chemistry, R. Domanovića 12, 34000 Kragujevac, Serbia;

<sup>2</sup>University of Belgrade, Institute of Molecular Genetics and Genetic Engineering, Vojvode Stepe 444a, 11042 Belgrade, Serbia;

<sup>3</sup>University of Ljubljana, Faculty of Chemistry and Chemical Technology, Večna pot 113, SI-1000, Ljubljana, Slovenia;

<sup>4</sup>Serbian Academy of Sciences and Arts, Knez Mihailova 35, 11000 Belgrade, Serbia

\* Corresponding author: [nevena.stevanovic@pmf.kg.ac.rs](mailto:nevena.stevanovic@pmf.kg.ac.rs)

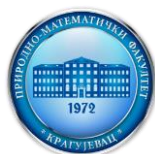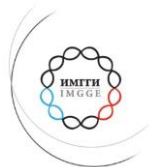

University of Ljubljana  
Faculty of Chemistry and Chemical Technology

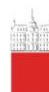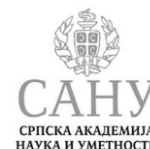

# Silver(I) complexes with clinically used azoles: synthesis, structural characterization and antimicrobial evaluation

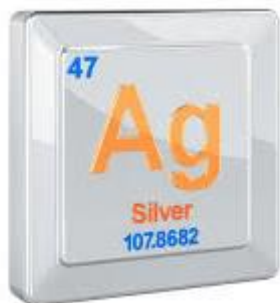

Synthesis

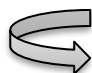

Structural  
characterization

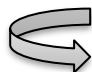

Antimicrobial  
activity

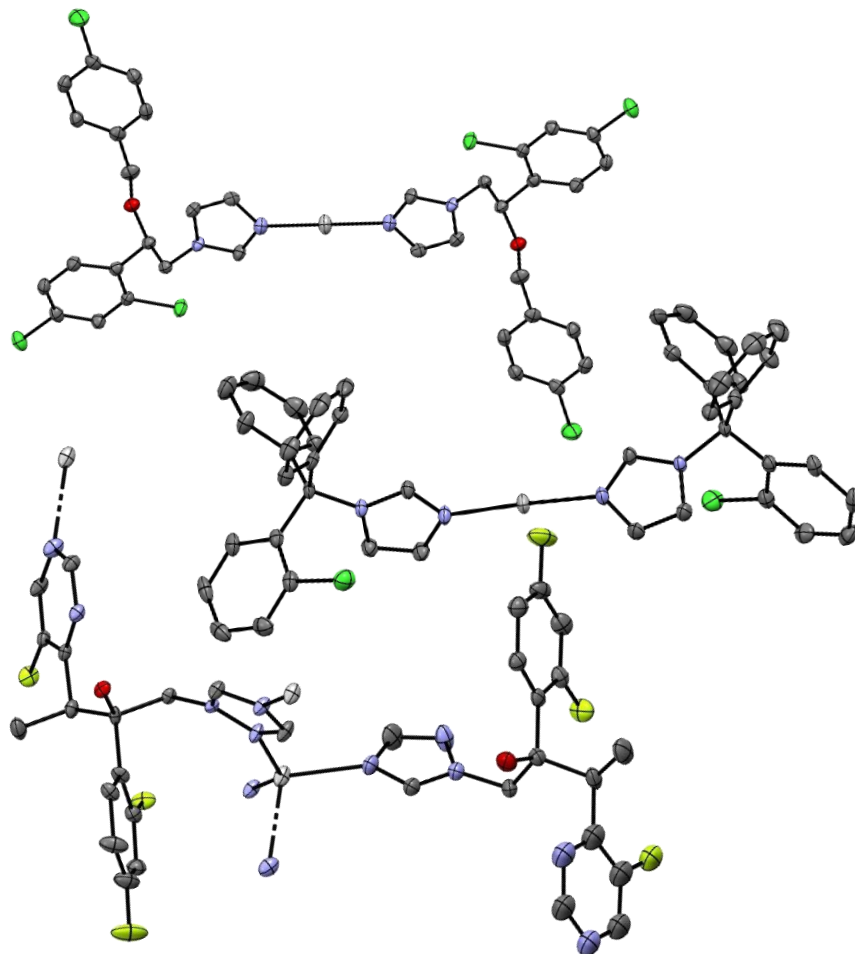

Clotrimazole

Voriconazole

Clinically  
used azoles

Econazole

ECMC  
2022

The 8th International Electronic  
Conference on Medicinal Chemistry

01-30 NOVEMBER 2022 | ONLINE

## Abstract:

Recently, we synthesized silver(I) complex with the antifungal agent itraconazole, which showed improved anti-*Candida* potential and therapeutic safety in comparison to itraconazole and rescued the zebrafish embryos of lethal *C. albicans* infection at safe doses.<sup>1</sup> Inspired by these results, in the present study, three new silver(I) complexes with clinically used azoles, econazole (ecz), clotrimazole (ctz) and voriconazole (vcz),  $[\text{Ag}(\text{ecz})_2]\text{SbF}_6$  (**Ag1**),  $[\text{Ag}(\text{ctz})_2]\text{SbF}_6$  (**Ag2**) and  $\{[\text{Ag}(\text{vcz})_2]\text{SbF}_6\}_n$  (**Ag3**) were synthesized and structurally characterized by elemental microanalysis, mass spectrometry, spectroscopy (<sup>1</sup>H NMR, IR and UV-Vis), cyclic voltammetry, molar conductivity measurements and single crystal X-ray diffraction analysis.<sup>2</sup> The spectroscopic and crystallographic results revealed that, in the synthesized silver(I) complexes, azole ligands are monodentately coordinated to the Ag(I) ion through the nitrogen atom forming  $[\text{Ag}(\text{azole})_2]^+$  complex cation. The antimicrobial effect of complexes and azole ligands was evaluated against different *Candida* species, as well as Gram-positive and Gram-negative bacteria. The synthesized complexes **Ag1** – **3** exhibited good to moderate antimicrobial activity being, in most cases, more active than the corresponding azole ligands. Complexes **Ag2** and **Ag3** also showed strong inhibitory activity against *C. albicans* biofilm formation and strong inhibition of *C. albicans* filamentation at subinhibitory concentrations.

**Keywords:** Silver(I) complexes; Antifungal azoles; Antimicrobials; Biofilms.

1. N. Lj. Stevanović, B. Đ. Glišić, S. Vojnovic, H. Wadepohl, T. P. Andrejević, S. Ž. Đurić, N. D. Savić, J. Nikodinovic-Runic, M. I. Djuran, A. Pavic, *J. Mol. Struct.* 1232 (2021) 130006.

2. N. Lj. Stevanović, J. Kljun, M. Stankovic, S. Skaro-Bogojevic, J. Lazic, I. Turel, M. I. Djuran, B. Đ. Glišić, *Manuscript in preparation* .

ECMC  
2022

The 8th International Electronic  
Conference on Medicinal Chemistry  
01–30 NOVEMBER 2022 | ONLINE

# Introduction

- ✓ Fungal infections represent a serious problem for modern-day healthcare
- ✓ Antifungal agents inhibit the enzymes (cytochrome P450), included in the synthesis of ergosterol, which is a component of the fungal cell membrane
- ✓ Azoles are of particular importance as potent broad-spectrum agents used as first-line therapy for the treatment of many invasive fungal infections associated with significant morbidity and mortality worldwide

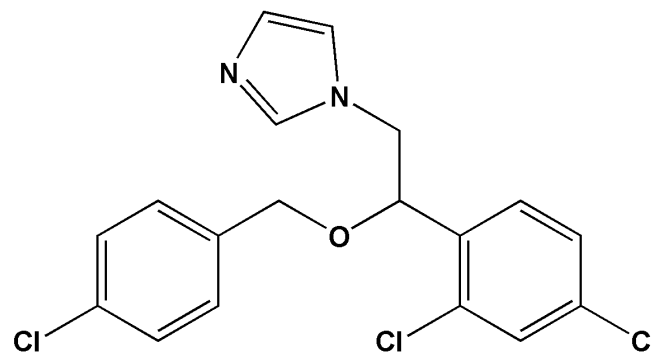

Econazole (ecz)

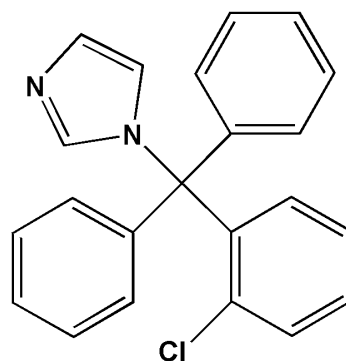

Clotrimazole (ctz)

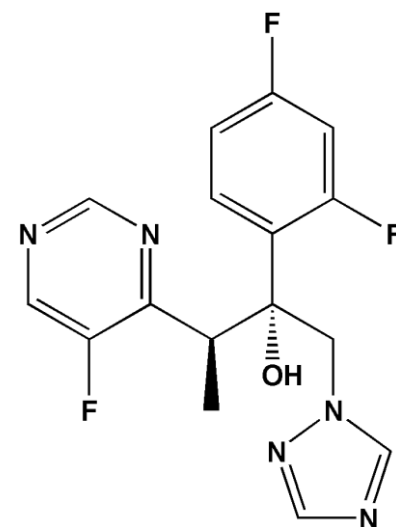

Voriconazole (vcz)

# Results and discussion

✓ Silver(I) complexes were synthesized according to the presented procedure

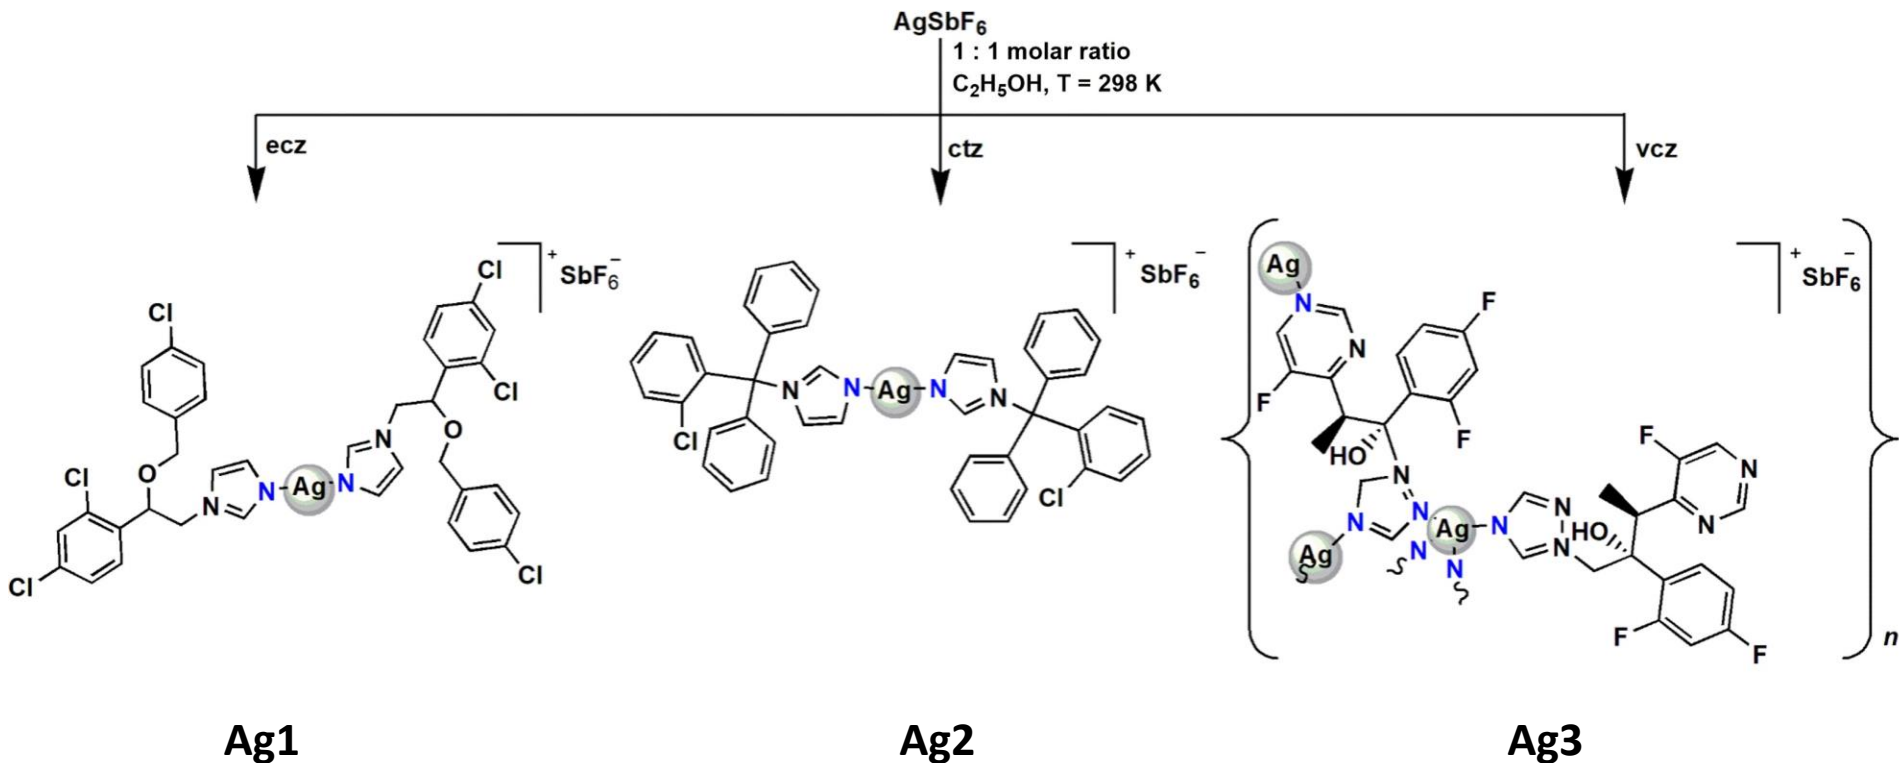

## Structural characterization

- ✓ The synthesized complexes were characterized by elemental analysis, UV-Vis, IR and  $^1\text{H}$  NMR spectroscopy, mass spectrometry and cyclic voltammetry, while their structure was determined by a single-crystal X-ray diffraction analysis

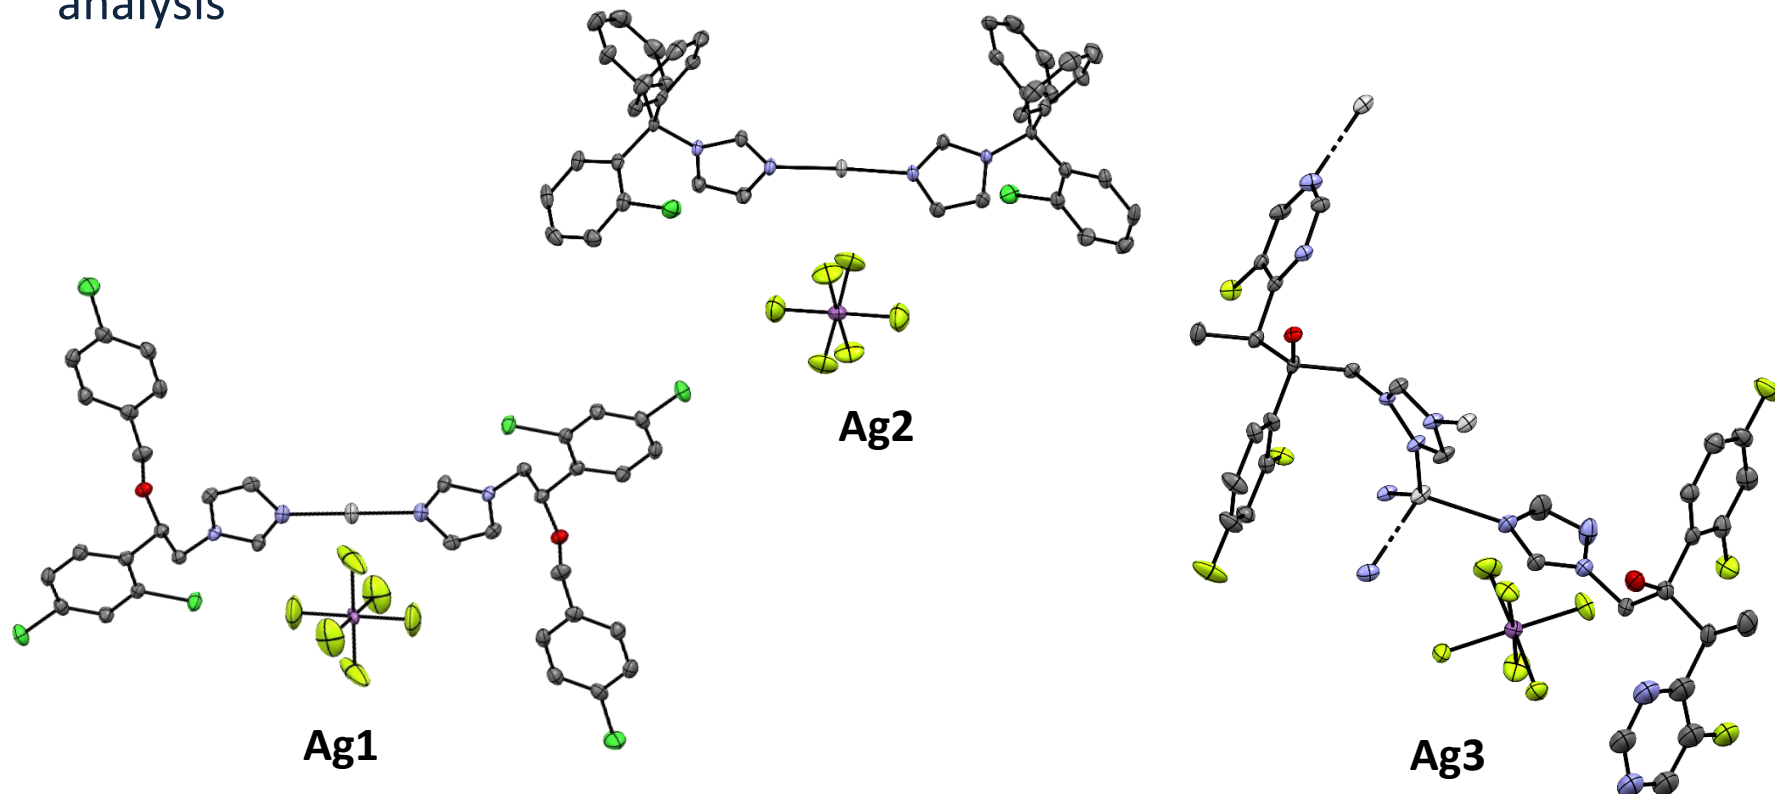

# UV-Vis stability

DMSO solvent

$c(\text{Ag1}) = 6.4 \times 10^{-4} \text{ M}$

$c(\text{Ag2}) = 4.8 \times 10^{-4} \text{ M}$

$c(\text{Ag3}) = 7.4 \times 10^{-4} \text{ M}$

$t = 25 \text{ }^\circ\text{C}$

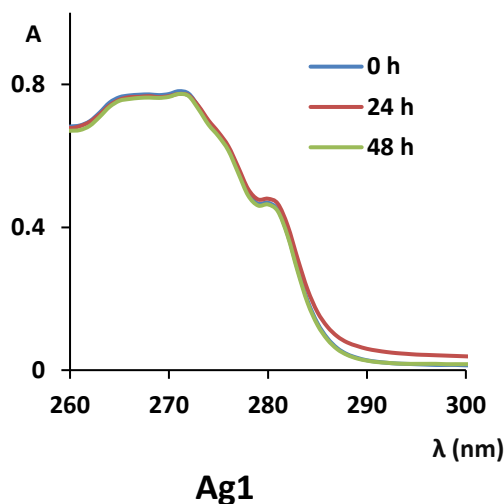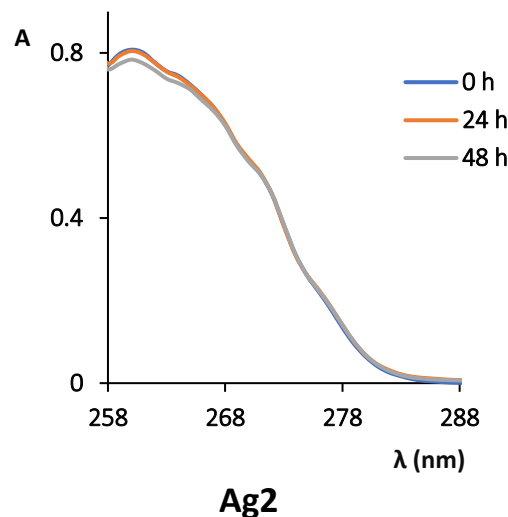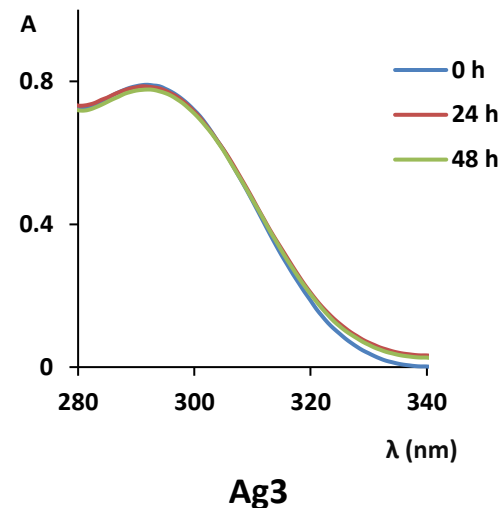

- ✓ The intensity and the position of the absorption maxima of **Ag1 – 3** and the shape of spectra remained unmodified during the investigated time, being in accordance with the stability of these complexes in solution

ECMC  
2022

The 8th International Electronic  
Conference on Medicinal Chemistry  
01–30 NOVEMBER 2022 | ONLINE

# Electrochemical characterization

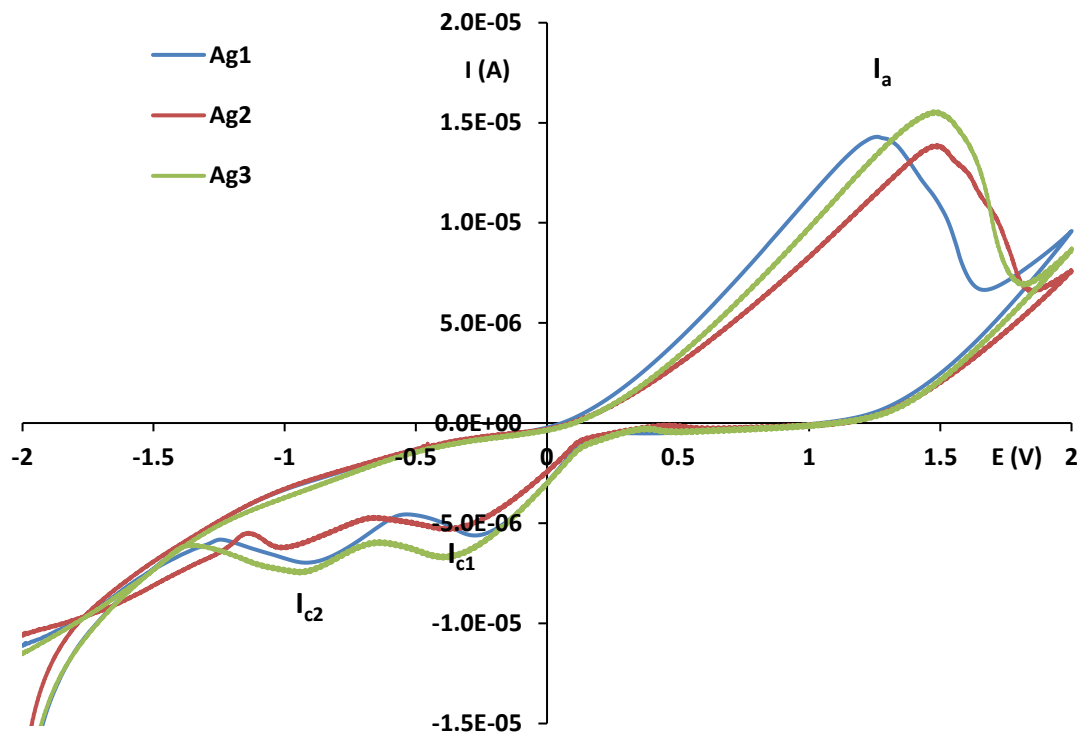

- ✓ Cyclic voltammograms of complexes **Ag1 – 3** recorded at the GC electrode in DMSO and 0.1 M tetrabutylammonium hexafluorophosphate (TBAHP) as a supporting electrolyte at a scan rate of 50 mV/s. The conditions are given as follows:  $E_{\text{begin}} = -2.0 \text{ V}$ ,  $E_{\text{end}} = 2.0 \text{ V}$  and  $E_{\text{step}} = 0.002 \text{ V}$



# Antimicrobial potential

| Test organism:     | <i>C. albicans</i> | <i>C. parapsilosis</i> | <i>C. krusei</i> | <i>C. glabrata</i> | <i>P. aeruginosa</i> | <i>E. coli</i> | <i>S. aureus</i> | <i>L. monocytogenes</i> | MRC-5     |
|--------------------|--------------------|------------------------|------------------|--------------------|----------------------|----------------|------------------|-------------------------|-----------|
| Ligand/Complex     |                    |                        |                  |                    |                      |                |                  |                         |           |
| Econazole (ecz)    | 7.00               | 3.90                   | 14.10            | 56.20              | >500                 | >500           | 225              | >500                    | 10 ± 1.0  |
| Clotrimazole (ctz) | 2.60               | 10.2                   | 1.40             | 9.10               | >500                 | >500           | 290              | >500                    | 8.7 ± 0.4 |
| Voriconazole (vcz) | 35.80              | 0.30                   | 1.40             | 572                | >500                 | >500           | >500             | >500                    | 859 ± 5.0 |
| Ag1                | 2.25               | 2.25                   | 27.10            | 11.29              | 22.6                 | 11.30          | 2.70             | 22.60                   | 10 ± 1.0  |
| Ag2                | 0.12               | 0.01                   | 0.03             | 0.97               | 12.10                | 12.10          | 2.61             | 12.10                   | 16 ± 0.9  |
| Ag3                | 0.48               | 0.01                   | 0.01             | 0.06               | 11.90                | 23.90          | 47.90            | 47.90                   | 36 ± 1.5  |

- ✓ Antimicrobial activity of silver(I) complexes and the corresponding azole expressed as MIC ( $\mu\text{M}$ ) in comparison to their cytotoxicity against healthy human fibroblasts MRC-5 ( $\text{IC}_{50}$ ,  $\mu\text{M}$ )

## Filamentation test on *C. albicans*

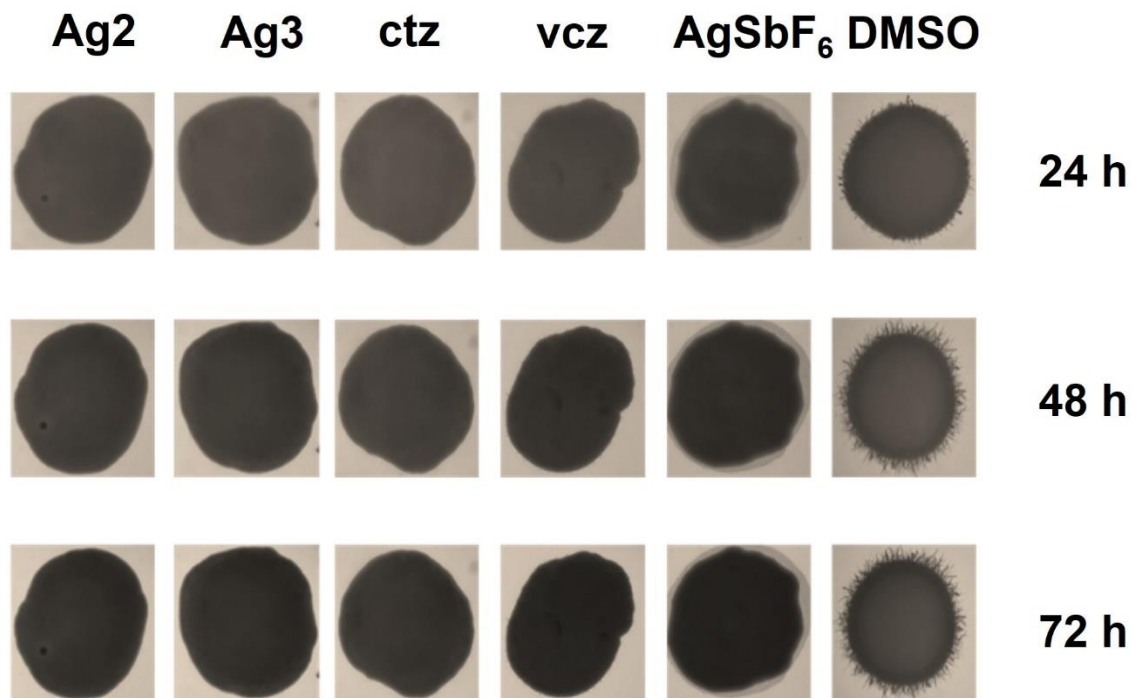

- ✓ Filamentation of *C. albicans* ATCC 10231 in the presence of subinhibitory ( $0.5 \times$  MIC value) concentrations of complexes **Ag2** and **Ag3**

## Inhibition of *C. albicans* biofilm formation

| Compounds                        | Ag2      | Ag3      | ctz      | vcz      |
|----------------------------------|----------|----------|----------|----------|
| Biofilm formation inhibition [%] | 86 ± 1.3 | 87 ± 0.4 | 79 ± 3.9 | 62 ± 6.3 |

## Inhibition of *P. aeruginosa* biofilm formation

| Compounds                        | Ag2      | Ag3     | ctz      | vcz     |
|----------------------------------|----------|---------|----------|---------|
| Biofilm formation inhibition [%] | 14 ± 1.4 | 3 ± 1.4 | 19 ± 1.1 | 4 ± 1.1 |

- ✓ Effect of complexes **Ag2**, **Ag3** and azoles on biofilm formation of *C. albicans* and *P. aeruginosa*. Tested concentration for biofilm inhibition was 0.5 × MIC

## Conclusions

- ✓ Three new silver(I) complexes with clinically used azoles, econazole (ecz), clotrimazole (ctz) and voriconazole (vcz),  $[\text{Ag}(\text{ecz})_2]\text{SbF}_6$  (**Ag1**),  $[\text{Ag}(\text{ctz})_2]\text{SbF}_6$  (**Ag2**) and  $\{[\text{Ag}(\text{vcz})_2]\text{SbF}_6\}_n$  (**Ag3**) were synthesized and structurally characterized
- ✓ Azole ligands are coordinated to the Ag(I) ion through the nitrogen atom, leading to the formation of  $[\text{Ag}(\text{azole})_2]^+$  complex cation
- ✓ The synthesized complexes **Ag1** – **3** have shown good to moderate antimicrobial activity being, in most cases, more active than the corresponding azoles
- ✓ Two most active complexes, **Ag2** and **Ag3**, have shown strong inhibitory activity against *C. albicans* biofilm formation and strong inhibition of *C. albicans* filamentation at subinhibitory concentrations

## Acknowledgments

This research has been financially supported by the Ministry of Education, Science and Technological Development of the Republic of Serbia (Agreement No. 451-03-68/2022-14/200042 and 451-03-68/2022-14/200122), the Serbian Academy of Sciences and Arts (project F128) and the Slovenian Research Agency (grant P1-0175).

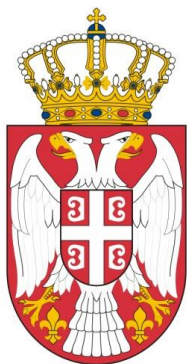

МИНИСТАРСТВО ПРОСВЕТЕ,  
НАУКЕ И ТЕХНОЛОШКОГ РАЗВОЈА

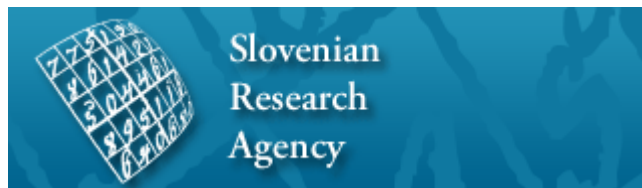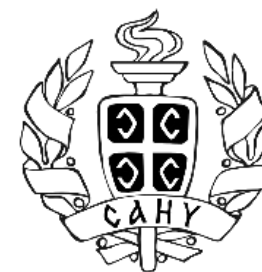

ECMC  
2022

The 8th International Electronic  
Conference on Medicinal Chemistry

01-30 NOVEMBER 2022 | ONLINE
